# Supplementary material for: Habitual Mask Wearing as Part of COVID-19 Control in Japan: An Assessment Using the Self-Report Habit Index
Source: MDPI journal article supplement (doi:10.3390/bs13110951), 2023-11-19
Supplement: s1 [file s1]

### Supplementary Material

**Table S1: Correlations among variables regarding mask usage**

|            | Severity | Protection | Prevention | Impulsion | Norm | Relief | Frequency |
|------------|----------|------------|------------|-----------|------|--------|-----------|
| Severity   | -        |            |            |           |      |        |           |
| Protection | 0.31     | -          |            |           |      |        |           |
| Prevention | 0.27     | 0.64       | -          |           |      |        |           |
| Impulsion  | 0.39     | 0.49       | 0.40       | -         |      |        |           |
| Norm       | 0.33     | 0.44       | 0.36       | 0.63      | -    |        |           |
| Relief     | 0.33     | 0.58       | 0.48       | 0.57      | 0.63 | -      |           |
| Frequency  | 0.14     | 0.19       | 0.16       | 0.24      | 0.30 | 0.23   | -         |
| <i>M</i>   | 3.17     | 3.38       | 3.43       | 3.76      | 3.99 | 3.65   | 2.79      |
| <i>SD</i>  | 1.11     | 1.01       | 1.03       | 1.04      | 1.05 | 1.07   | 0.52      |

*N* = 2640

*M*: Means; *SD*: Standard Deviation; *N*: number of samples

**Table S2: Association between mask wearing and psychological reasons in female participants**

| Variable   | Standardized coefficient | <i>p</i> -value |
|------------|--------------------------|-----------------|
| Severity   | 0.03 (0.02)              | 0.30            |
| Protection | 0.05 (0.03)              | 0.17            |
| Prevention | -0.02 (0.03)             | 0.55            |
| Impulsion  | 0.03 (0.03)              | 0.43            |
| Norm       | 0.14 (0.03)              | <0.0001         |
| Relief     | 0.06 (0.03)              | 0.06            |

Frequency of mask usage as explained by six variables. Dependent variable: the frequency of mask wearing; independent variable: six psychological reasons variables. Standard errors are shown in brackets.  $R^2 = 0.06$ ,  $R^2(\text{adj}) = 0.06$ , root mean square error (RSME) = 0.44.

The test level is  $\alpha = 0.05$ ; *p*-value is calculated by multiple linear regression.

**Table S3: Association between mask wearing and psychological reasons in male participants**

| Variable   | Standardized coefficient | <i>p</i> -value |
|------------|--------------------------|-----------------|
| Severity   | 0.01 (0.03)              | 0.82            |
| Protection | 0.03 (0.04)              | 0.42            |
| Prevention | 0.06 (0.04)              | 0.11            |
| Impulsion  | 0.06 (0.04)              | 0.12            |
| Norm       | 0.27 (0.04)              | <0.0001         |
| Relief     | -0.04 (0.04)             | 0.38            |

Frequency of mask usage as explained by six variables. Dependent variable: the frequency of mask wearing; independent variable: six psychological reasons variables. Standard errors are shown in brackets.  $R^2 = 0.11$ ,  $R^2(\text{adj}) = 0.11$ , root mean square error (RSME) = 0.53.

The test level is  $\alpha = 0.05$ ; *p*-value is calculated by multiple linear regression.

**Table S4: Association between mask wearing and psychological reasons in married participants**

| Variable   | Standardized coefficient | <i>p</i> -value |
|------------|--------------------------|-----------------|
| Severity   | 0.01 (0.02)              | 0.78            |
| Protection | 0.05 (0.04)              | 0.17            |
| Prevention | -0.01 (0.03)             | 0.71            |
| Impulsion  | 0.04 (0.03)              | 0.25            |
| Norm       | 0.20 (0.04)              | <0.0001         |
| Relief     | 0.02 (0.04)              | 0.61            |

Frequency of mask usage as explained by six variables. Dependent variable: the frequency of mask wearing; independent variable: six psychological reasons variables. Standard errors are shown in brackets.  $R^2 = 0.07$ ,  $R^2(\text{adj}) = 0.07$ , root mean square error (RSME) = 0.47.

The test level is  $\alpha = 0.05$ ; *p*-value is calculated by multiple linear regression.

**Table S5: Association between mask wearing and psychological reasons in unmarried participants**

| Variable   | Standardized coefficient | <i>p</i> -value |
|------------|--------------------------|-----------------|
| Severity   | 0.03 (0.03)              | 0.39            |
| Protection | 0.03 (0.04)              | 0.49            |
| Prevention | 0.06 (0.04)              | 0.13            |
| Impulsion  | 0.06 (0.04)              | 0.10            |
| Norm       | 0.24 (0.04)              | <0.0001         |
| Relief     | 0.01 (0.04)              | 0.88            |

Frequency of mask usage as explained by six variables. Dependent variable: the frequency of mask wearing; independent variable: six psychological reasons variables. Standard errors are shown in brackets.  $R^2 = 0.12$ ,  $R^2(\text{adj}) = 0.12$ , root mean square error (RSME) = 0.51.

The test level is  $\alpha = 0.05$ ; *p*-value is calculated by multiple linear regression.

**Table S6: Association between mask wearing and psychological reasons in participants who have at least one child**

| Variable   | Standardized coefficient | <i>p</i> -value |
|------------|--------------------------|-----------------|
| Severity   | 0.01 (0.03)              | 0.83            |
| Protection | 0.03 (0.04)              | 0.46            |
| Prevention | -0.03 (0.03)             | 0.35            |
| Impulsion  | 0.06 (0.04)              | 0.14            |
| Norm       | 0.21 (0.04)              | <0.0001         |
| Relief     | 0.02 (0.04)              | 0.60            |

Frequency of mask usage as explained by six variables. Dependent variable: the frequency of mask wearing; independent variable: six psychological reasons variables. Standard errors are shown in brackets.  $R^2 = 0.07$ ,  $R^2(\text{adj}) = 0.07$ , root mean square error (RSME) = 0.48.

The test level is  $\alpha = 0.05$ ; *p*-value is calculated by multiple linear regression.

**Table S7: Association between mask wearing and psychological reasons in participants who do not have children**

| Variable   | Standardized coefficient | <i>p</i> -value |
|------------|--------------------------|-----------------|
| Severity   | 0.03 (0.03)              | 0.29            |
| Protection | 0.05 (0.04)              | 0.20            |
| Prevention | 0.06 (0.03)              | 0.06            |
| Impulsion  | 0.05 (0.04)              | 0.17            |
| Norm       | 0.23 (0.03)              | <0.0001         |
| Relief     | 0.01 (0.04)              | 0.80            |

Frequency of mask usage as explained by six variables. Dependent variable: the frequency of mask wearing; independent variable: six psychological reasons variables. Standard errors are shown in brackets.  $R^2 = 0.12$ ,  $R^2(\text{adj}) = 0.12$ , root mean square error (RSME) = 0.50.

The test level is  $\alpha = 0.05$ ; *p*-value is calculated by multiple linear regression.

**Table S8: Association between mask wearing and psychological reasons in participants aged 20–29 years old**

| Variable   | Standardized coefficient | <i>p</i> -value |
|------------|--------------------------|-----------------|
| Severity   | -0.01 (0.05)             | 0.83            |
| Protection | 0.02 (0.07)              | 0.74            |
| Prevention | 0.12 (0.06)              | 0.05            |
| Impulsion  | 0.00 (0.07)              | 0.97            |
| Norm       | 0.28 (0.06)              | <0.0001         |
| Relief     | -0.04 (0.06)             | 0.45            |

Frequency of mask usage as explained by six variables. Dependent variable: the frequency of mask wearing; independent variable: six psychological reasons variables. Standard errors are shown in brackets.  $R^2 = 0.12$ ,  $R^2(\text{adj}) = 0.10$ , root mean square error (RSME) = 0.52.

The test level is  $\alpha = 0.05$ ; *p*-value is calculated by multiple linear regression.



**Table S9: Association between mask wearing and psychological reasons in participants aged 30–39 years old**

| Variable   | Standardized coefficient | <i>p</i> -value |
|------------|--------------------------|-----------------|
| Severity   | -0.01 (0.04)             | 0.87            |
| Protection | 0.01 (0.06)              | 0.83            |
| Prevention | -0.02 (0.05)             | 0.69            |
| Impulsion  | 0.10 (0.06)              | 0.06            |
| Norm       | 0.23 (0.06)              | <0.0001         |
| Relief     | -0.01 (0.06)             | 0.91            |

Frequency of mask usage as explained by six variables. Dependent variable: the frequency of mask wearing; independent variable: six psychological reasons variables. Standard errors are shown in brackets.  $R^2 = 0.11$ ,  $R^2(\text{adj}) = 0.10$ , root mean square error (RSME) = 0.47.

The test level is  $\alpha = 0.05$ ; *p*-value is calculated by multiple linear regression.

**Table S10: Association between mask wearing and psychological reasons in participants aged 40–49 years old**

| Variable   | Standardized coefficient | <i>p</i> -value |
|------------|--------------------------|-----------------|
| Severity   | 0.08 (0.05)              | 0.12            |
| Protection | 0.10 (0.07)              | 0.14            |
| Prevention | 0.04 (0.07)              | 0.58            |
| Impulsion  | 0.12 (0.06)              | 0.07            |
| Norm       | 0.20 (0.06)              | <0.01           |
| Relief     | -0.03 (0.07)             | 0.65            |

Frequency of mask usage as explained by six variables. Dependent variable: the frequency of mask wearing; independent variable: six psychological reasons variables. Standard errors are shown in brackets.  $R^2 = 0.14$ ,  $R^2(\text{adj}) = 0.12$ , root mean square error (RSME) = 0.52.

The test level is  $\alpha = 0.05$ ; *p*-value is calculated by multiple linear regression.

**Table S11: Association between mask wearing and psychological reasons in participants aged 50–59 years old**

| Variable   | Standardized coefficient | <i>p</i> -value |
|------------|--------------------------|-----------------|
| Severity   | 0.10 (0.05)              | 0.07            |
| Protection | -0.03 (0.07)             | 0.70            |
| Prevention | -0.01 (0.06)             | 0.85            |
| Impulsion  | 0.01 (0.07)              | 0.85            |
| Norm       | 0.17 (0.07)              | 0.01            |
| Relief     | 0.16 (0.07)              | 0.03            |

Frequency of mask usage as explained by six variables. Dependent variable: the frequency of mask wearing; independent variable: six psychological reasons variables. Standard errors are shown in brackets.  $R^2 = 0.11$ ,  $R^2(\text{adj}) = 0.10$ , root mean square error (RSME) = 0.48.

The test level is  $\alpha = 0.05$ ; *p*-value is calculated by multiple linear regression.

**Table S12: Association between mask wearing and psychological reasons in participants aged 60–69 years old**

| Variable   | Standardized coefficient | <i>p</i> -value |
|------------|--------------------------|-----------------|
| Severity   | 0.04 (0.04)              | 0.34            |
| Protection | 0.10 (0.07)              | 0.15            |
| Prevention | 0.00 (0.06)              | 0.96            |
| Impulsion  | 0.11 (0.06)              | 0.08            |
| Norm       | 0.13 (0.07)              | 0.07            |
| Relief     | -0.03 (0.07)             | 0.70            |

Frequency of mask usage as explained by six variables. Dependent variable: the frequency of mask wearing; independent variable: six psychological reasons variables. Standard errors are shown in brackets.  $R^2 = 0.08$ ,  $R^2(\text{adj}) = 0.07$ , root mean square error (RSME) = 0.46.

The test level is  $\alpha = 0.05$ ; *p*-value is calculated by multiple linear regression.

**Table S13: Association between mask wearing and psychological reasons in participants aged  $\geq 70$  years old**

| Variable   | Standardized coefficient | <i>p</i> -value |
|------------|--------------------------|-----------------|
| Severity   | -0.02 (0.05)             | 0.62            |
| Protection | 0.05 (0.07)              | 0.50            |
| Prevention | -0.04 (0.06)             | 0.50            |
| Impulsion  | -0.03 (0.07)             | 0.67            |
| Norm       | 0.31 (0.07)              | <0.0001         |
| Relief     | 0.09 (0.06)              | 0.16            |

Frequency of mask usage as explained by six variables. Dependent variable: the frequency of mask wearing; independent variable: six psychological reasons variables. Standard errors are shown in brackets.  $R^2 = 0.10$ ,  $R^2(\text{adj}) = 0.08$ , root mean square error (RSME) = 0.48.

The test level is  $\alpha = 0.05$ ; *p*-value is calculated by multiple linear regression.

**Table S14: Self-report habit index scores stratified in different groups**

| SRHI score in indoor space                |                     |              | SRHI score on public transport        |                        |              |
|-------------------------------------------|---------------------|--------------|---------------------------------------|------------------------|--------------|
| Estimate†                                 |                     |              | Estimate†                             |                        |              |
| Sex                                       |                     |              | Sex                                   |                        |              |
|                                           | Male                | 61.5 (±16.5) |                                       | Male                   | 63.6 (±19.8) |
|                                           | Female              | 68.2 (±14.2) |                                       | Female                 | 70.8 (±16.1) |
| Marital status                            |                     |              | Marital status                        |                        |              |
|                                           | Married             | 66.8 (±14.8) |                                       | Married                | 69.1 (±17.8) |
|                                           | Unmarried           | 62.5 (±16.5) |                                       | Unmarried              | 64.9 (±18.8) |
| Have at least one child                   |                     |              | Have at least one child               |                        |              |
|                                           | Yes                 | 67.3 (±14.9) |                                       | Yes                    | 69.1 (±18.2) |
|                                           | No                  | 62.7 (±16.2) |                                       | No                     | 65.5 (±18.4) |
| Age group (years)                         |                     |              | Age group (years)                     |                        |              |
|                                           | 20–29               | 61.9 (±15.3) |                                       | 20–29                  | 65.2 (±16.8) |
|                                           | 30–39               | 61.4 (±16.2) |                                       | 30–39                  | 62.7 (±19.8) |
|                                           | 40–49               | 62.0 (±16.8) |                                       | 40–49                  | 65.7 (±17.6) |
|                                           | 50–59               | 64.9 (±15.2) |                                       | 50–59                  | 67.8 (±17.6) |
|                                           | 60–69               | 68.2 (±14.6) |                                       | 60–69                  | 69.6 (±18.6) |
|                                           | ≥70                 | 70.7 (±13.7) |                                       | ≥70                    | 72.1 (±18.4) |
| Indoor space that most frequently visited |                     |              | Public transport most frequently used |                        |              |
|                                           | Office              | 62.9 (±15.8) |                                       | Train                  | 69.5 (±15.3) |
|                                           | School              | 66.2 (±14.8) |                                       | Bus                    | 70.5 (±15.3) |
|                                           | Healthcare Facility | 64.9 (±16.1) |                                       | Aircraft               | 60.6 (±16.3) |
|                                           | Shopping Mall       | 67.4 (±15.1) |                                       | Boat                   | 55.9 (±17.7) |
|                                           | Public Facility     | 64.5 (±16.0) |                                       | Other Public Transport | 53.2 (±26.8) |
|                                           | Other Indoor Spaces | 64.1 (±19.0) |                                       |                        |              |

† Mean (± Standard deviation)

**Table S15: Principal component analysis of self-report habit index in indoor spaces**

|                                                         | Married<br>People* | Have at<br>least one<br>child** | 60–69<br>years*** | ≥70<br>years*** | Shopping<br>mall† | Public<br>facility‡ |
|---------------------------------------------------------|--------------------|---------------------------------|-------------------|-----------------|-------------------|---------------------|
|                                                         | Compon<br>ent 1    | Compone<br>nt 1                 | Compon<br>ent 1   | Compo<br>nent 1 | Compon<br>ent 1   | Compo<br>nent 1     |
| Eigenvalue                                              | 7.9                | 8.1                             | 8.1               | 8.1             | 8.0               | 7.8                 |
| Variance explained (%)                                  | 65.75              | 67.17                           | 67.56             | 67.88           | 66.54             | 64.63               |
| <i>Item loadings</i>                                    |                    |                                 |                   |                 |                   |                     |
| 1. I do frequently.                                     | 0.81               | 0.83                            | 0.81              | 0.83            | 0.81              | 0.85                |
| 2. I do automatically.                                  | 0.84               | 0.85                            | 0.85              | 0.84            | 0.84              | 0.8                 |
| 3. I do without having to consciously remember.         | 0.87               | 0.89                            | 0.89              | 0.89            | 0.88              | 0.91                |
| 4. that makes me feel weird if I do not do it.          | 0.81               | 0.81                            | 0.82              | 0.84            | 0.82              | 0.82                |
| 5. I do without thinking.                               | 0.88               | 0.88                            | 0.87              | 0.88            | 0.87              | 0.75                |
| 6. that would require effort not to do it.              | 0.58               | 0.57                            | 0.61              | 0.57            | 0.59              | 0.53                |
| 7. that belongs to my (daily, weekly, monthly) routine. | 0.83               | 0.85                            | 0.83              | 0.85            | 0.85              | 0.85                |
| 8. I start doing before I realize I'm doing it.         | 0.8                | 0.79                            | 0.83              | 0.76            | 0.79              | 0.82                |
| 9. I would find hard not to do.                         | 0.86               | 0.87                            | 0.88              | 0.87            | 0.85              | 0.88                |
| 10. I have no need to think about doing.                | 0.79               | 0.79                            | 0.78              | 0.79            | 0.8               | 0.72                |
| 11. that's typically "me."                              | 0.78               | 0.79                            | 0.82              | 0.84            | 0.79              | 0.78                |
| 12. I have been doing for a long time.                  | 0.85               | 0.87                            | 0.85              | 0.87            | 0.85              | 0.87                |

\* The number of married people is 1,440.

\*\* The number of people who have at least one child is 1,247.

\*\*\* The 60–69 and ≥70 years groups have the same sample size of 440.

† The number of people who frequently visit shopping malls is 935.

‡ The number of people who frequently visit public facilities is 91.

Component 1: the first principal component.

**Table S16: Principal component analysis of self-report habit index on public transport**

|                                                            | People who are 20–29 years old* |                 |                 |                 | People who frequently use trains** |                 |                 |                 |
|------------------------------------------------------------|---------------------------------|-----------------|-----------------|-----------------|------------------------------------|-----------------|-----------------|-----------------|
|                                                            | Before Rotation                 |                 | After Rotation  |                 | Before Rotation                    |                 | After Rotation  |                 |
|                                                            | Compon<br>ent 1                 | Compon<br>ent 2 | Compon<br>ent 1 | Compon<br>ent 2 | Compon<br>ent 1                    | Compon<br>ent 2 | Compon<br>ent 1 | Compo<br>nent 2 |
| Eigenvalue                                                 | 8.3                             | 1.0             | 5.5             | 3.3             | 8.4                                | 1.0             | 5.1             | 3.7             |
| Variance explained (%)                                     | 69.45                           | 8.46            | 45.59           | 27.46           | 69.74                              | 7.98            | 42.20           | 30.71           |
| <i>Item loadings</i>                                       |                                 |                 |                 |                 |                                    |                 |                 |                 |
| 1. I do frequently.                                        | 0.84                            | -0.30           | 0.83            | -               | 0.82                               | -0.35           | 0.78            | -               |
| 2. I do automatically.                                     | 0.88                            | -0.20           | 0.82            | -               | 0.88                               | -0.23           | 0.85            | -               |
| 3. I do without having to<br>consciously remember.         | 0.90                            | -0.21           | 0.84            | -               | 0.90                               | -0.22           | 0.84            | -               |
| 4. that makes me feel weird<br>if I do not do it.          | 0.84                            | 0.27            | 0.51            | 0.70            | 0.84                               | 0.28            | 0.48            | 0.73            |
| 5. I do without thinking.                                  | 0.91                            | -0.07           | 0.77            | 0.50            | 0.90                               | -0.08           | 0.76            | 0.50            |
| 6. that would require effort<br>not to do it.              | 0.65                            | 0.57            | -               | 0.70            | 0.67                               | 0.53            | -               | 0.65            |
| 7. that belongs to my (daily,<br>weekly, monthly) routine. | 0.88                            | -0.28           | 0.85            | -               | 0.86                               | -0.26           | 0.75            | 0.41            |
| 8. I start doing before I<br>realize I'm doing it.         | 0.85                            | -0.06           | 0.68            | 0.47            | 0.82                               | -0.09           | 0.66            | 0.46            |
| 9. I would find hard not to<br>do.                         | 0.86                            | 0.19            | 0.56            | 0.66            | 0.87                               | 0.24            | 0.49            | 0.76            |
| 10. I have no need to think<br>about doing.                | 0.83                            | -0.03           | 0.65            | 0.48            | 0.84                               | 0.01            | 0.61            | 0.55            |
| 11. that's typically "me."                                 | 0.67                            | 0.55            | -               | 0.74            | 0.75                               | 0.47            | -               | 0.78            |
| 12. I have been doing for a<br>long time.                  | 0.82                            | -0.15           | 0.69            | 0.41            | 0.85                               | -0.13           | 0.66            | 0.49            |

\* The 20–29 years group has a sample size of 440.

\*\* The number of people who frequently use trains is 1,709.



Component 1: the first principal component; Component 2: the second principal component; Rotation: maximum likelihood extraction and varimax rotation method. Rotated component loading values  $< 0.4$  are not reported.
